# Supplementary material for: Genetics of educational attainment and social problem behaviors: Robust estimates of direct genetic effects
Source: Research Square preprint supplement (doi:10.21203/rs.3.rs-7328005/v1), 2025-08-29
Supplement: Supplementary file 1 [file dda872940029862983e20683.xlsx]

## Sheet: t1.EAfull
Table 1.	Comparison of the estimated effects of full EA offspring and parental polygenic indices on Behavioral scales across CBCL and YSR samples. All regressions include a set of controls. P-values are based on family clustered standard errors.
	CBCL						YSR
Behavioral scale		Model 1		Model 2				Model 1		Model 2
Predictor	N	Beta	P-value	Beta	P-value		N	Beta	P-value	Beta	P-value
Anxious	4504						3128
PGI Offspring EA		-0.0221506	0.169788	-0.0123463	0.613404			-0.00642499	0.709957	-0.035635	0.223168
PGI Parental EA				-0.00747839	0.649729					0.0218795	0.251602
Withdrawn	4527						3132
PGI Offspring EA		-0.00525346	0.726538	0.0312986	0.194186			0.019026	0.333001	0.0128483	0.676879
PGI Parental EA				-0.0278545	0.0763105					0.00462711	0.809932
Somatic Complaints	4495						3128
PGI Offspring EA		-0.0626179	7.77832e-05	-0.0249885	0.310643			-0.101717	3.59698e-08	-0.115465	8.11394e-05
PGI Parental EA				-0.028747	0.0820341					0.0102932	0.572107
Internalizing Problem Behavior	4554						3138
PGI Offspring EA		-0.0357384	0.0261216	-0.00415397	0.865448			-0.035104	0.052932	-0.0573785	0.0526533
PGI Parental EA				-0.0240732	0.142495					0.0166787	0.380837
Social Problems	4518						3131
PGI Offspring EA		-0.024593	0.117282	0.00408529	0.86462			0.0131391	0.487913	-0.00680871	0.832373
PGI Parental EA				-0.0218785	0.144761					0.014939	0.449842
Thought Problems	4479						3123
PGI Offspring EA		-0.0330421	0.0367936	0.0147915	0.567119			0.0157897	0.39785	-0.0275602	0.3877
PGI Parental EA				-0.0364736	0.025121					0.0324568	0.1066
Attention Problems	4525						3128
PGI Offspring EA		-0.0999959	1.25747e-09	-0.0814292	0.00155169			-0.0402425	0.0333001	-0.0552556	0.0853095
PGI Parental EA				-0.0141524	0.41137					0.0112353	0.565905
Externalizing Problem Behavior	4554						3138
PGI Offspring EA		-0.0802662	7.78397e-07	-0.0607838	0.0119508			-0.0364043	0.0496396	-0.0397707	0.20104
PGI Parental EA				-0.0148492	0.345649					0.00252065	0.90016
Rule-Breaking Behavior	4522						3122
PGI Offspring EA		-0.0885743	3.30536e-08	-0.0776767	0.00147616			-0.0626124	0.000367919	-0.0711598	0.0151798
PGI Parental EA				-0.00830038	0.601525					0.00640265	0.744976
Aggressive Behavior	4524						3123
PGI Offspring EA		-0.0672845	3.88125e-05	-0.0434394	0.0689598			-0.0171838	0.349723	-0.0139561	0.655648
PGI Parental EA				-0.0181837	0.244834					-0.00241737	0.903382

## Sheet: t2.EAdecomposed
Table 2.	Comparison of the estimated effects of decomposed EA offspring and parental polygenic indices on Behavioral scales across CBCL and YSR samples. All regressions include a set of controls. P-values are based on family clustered standard errors.
	CBCL						YSR
Behavioral scale		Model 1		Model 2				Model 1		Model 2
Predictor	N	Beta	P-value	Beta	P-value		N	Beta	P-value	Beta	P-value
Anxious	4504						3128
PGI Offspring EA NonCognitive		0.00596596	0.883606	0.0627839	0.352951			0.0763701	0.212976	0.0159731	0.874845
PGI Offspring EA Cognitive		-0.075865	0.0624155	-0.0971628	0.0868473			-0.00960554	0.881781	-0.0929386	0.333477
PGI Parental EA NonCognitive				-0.0428894	0.343016					0.0443889	0.511992
PGI Parental EA Cognitive				0.0175226	0.625314					0.0638896	0.279802
Withdrawn	4527						3132
PGI Offspring EA NonCognitive		-0.0126782	0.647786	0.0450986	0.342102			0.0800987	0.0714712	0.0273054	0.706334
PGI Offspring EA Cognitive		0.00164534	0.952529	0.0216156	0.627439			0.0685693	0.135721	0.0310058	0.659656
PGI Parental EA NonCognitive				-0.0434061	0.145386					0.0388957	0.387973
PGI Parental EA Cognitive				-0.0145954	0.614655					0.0284118	0.518921
Somatic Complaints	4495						3128
PGI Offspring EA NonCognitive		-0.0624675	0.0385378	-0.000600668	0.989609			-0.105911	0.0330086	-0.098299	0.187851
PGI Offspring EA Cognitive		-0.108029	0.000189471	-0.098044	0.0225544			-0.236025	1.00046e-06	-0.25414	0.000646752
PGI Parental EA NonCognitive				-0.0466276	0.131716					-0.00569891	0.899528
PGI Parental EA Cognitive				-0.00680613	0.806978					0.014209	0.754256
Internalizing Problem Behavior	4554						3138
PGI Offspring EA NonCognitive		-0.0639154	0.411412	0.106593	0.39985			0.0485468	0.692631	-0.0634768	0.749048
PGI Offspring EA Cognitive		-0.1799	0.0213172	-0.181939	0.10252			-0.162823	0.214024	-0.299254	0.128315
PGI Parental EA NonCognitive				-0.128333	0.132986					0.082289	0.523598
PGI Parental EA Cognitive				0.00445199	0.950427					0.10448	0.391479
Social Problems	4518						3131
PGI Offspring EA NonCognitive		0.00339433	0.909213	0.0405965	0.428246			0.0388547	0.369597	-0.0186206	0.789685
PGI Offspring EA Cognitive		-0.0416989	0.203814	-0.0411282	0.382099			0.0712888	0.094832	0.0263604	0.702271
PGI Parental EA NonCognitive				-0.0280084	0.382055					0.0423617	0.317136
PGI Parental EA Cognitive				0.000193535	0.994335					0.0340684	0.417351
Thought Problems	4479						3123
PGI Offspring EA NonCognitive		-0.0249637	0.307987	0.0384597	0.352191			0.0241485	0.573019	-0.016357	0.826576
PGI Offspring EA Cognitive		-0.0398582	0.124202	-0.0174974	0.668705			0.0301016	0.529517	-0.0737472	0.339176
PGI Parental EA NonCognitive				-0.0476175	0.067784					0.0294741	0.5281
PGI Parental EA Cognitive				-0.0163599	0.51997					0.0801142	0.088154
Attention Problems	4525						3128
PGI Offspring EA NonCognitive		-0.132946	0.00387883	-0.0566863	0.465224			-0.130171	0.0295036	-0.170935	0.0863129
PGI Offspring EA Cognitive		-0.263918	1.3876e-07	-0.288115	0.000156888			-0.0688603	0.231039	-0.096729	0.307615
PGI Parental EA NonCognitive				-0.057393	0.252239					0.0300311	0.612103
PGI Parental EA Cognitive				0.0201996	0.678611					0.0210586	0.732014
Externalizing Problem Behavior	4554						3138
PGI Offspring EA NonCognitive		-0.171922	0.0133022	-0.0430121	0.702202			-0.18099	0.130917	-0.141822	0.469498
PGI Offspring EA Cognitive		-0.295004	0.000109627	-0.305248	0.00622618			-0.168218	0.177851	-0.0737527	0.723603
PGI Parental EA NonCognitive				-0.0970361	0.175857					-0.028583	0.817626
PGI Parental EA Cognitive				0.0101664	0.882724					-0.0729267	0.589611
Rule-Breaking Behavior	4522						3122
PGI Offspring EA NonCognitive		-0.0850172	0.00033429	-0.047429	0.221388			-0.108719	0.0218991	-0.141962	0.0589377
PGI Offspring EA Cognitive		-0.0944689	0.000211681	-0.102549	0.00819215			-0.126559	0.00814592	-0.0862678	0.273859
PGI Parental EA NonCognitive				-0.028285	0.25538					0.0247482	0.62466
PGI Parental EA Cognitive				0.00698385	0.771079					-0.0318816	0.537229
Aggressive Behavior	4524						3123
PGI Offspring EA NonCognitive		-0.0858906	0.0990279	0.0108562	0.896177			-0.0688158	0.430472	0.0197575	0.893281
PGI Offspring EA Cognitive		-0.201162	0.000328518	-0.200627	0.0141789			-0.0688641	0.447358	-0.00965532	0.949529
PGI Parental EA NonCognitive				-0.0727389	0.164358					-0.0653046	0.466199
PGI Parental EA Cognitive				0.00122707	0.980738					-0.0447355	0.651355

## Sheet: t3.cbcl_EAfull_sex
Table 3.	Comparison of the estimated effects of full EA offspring and parental polygenic indices on Behavioral scales by sex in the parental report sample (CBCL). All regressions include a set of controls. P-values are based on family clustered standard errors.
	Girls						Boys
Behavioral scale		Model 1		Model 2				Model 1		Model 2
Predictor	N	Beta	P-value	Beta	P-value		N	Beta	P-value	Beta	P-value
Anxious	2263						2241
PGI Offspring EA		-0.0277969	0.258818	0.000234351	0.995382			-0.0147364	0.455733	-0.0208453	0.488396
PGI Parental EA				-0.0213955	0.404367					0.0046361	0.815236
Withdrawn	2276						2251
PGI Offspring EA		-0.0148956	0.440838	0.0246232	0.452951			0.00531479	0.80908	0.043616	0.221005
PGI Parental EA				-0.0301437	0.152128					-0.0290373	0.199374
Somatic Complaints	2252						2243
PGI Offspring EA		-0.0802671	0.00274384	-0.0211142	0.607003			-0.0484602	0.0039675	-0.0335379	0.231444
PGI Parental EA				-0.0453044	0.0895129					-0.0113201	0.52447
Internalizing Problem Behavior	2290						2264
PGI Offspring EA		-0.0481268	0.0504772	-0.000293225	0.994053			-0.0236994	0.222377	-0.00557859	0.854921
PGI Parental EA				-0.0365091	0.146953					-0.0137312	0.481286
Social Problems	2268						2250
PGI Offspring EA		-0.0502841	0.014259	-0.0347999	0.283704			-0.000536381	0.981263	0.0409588	0.255111
PGI Parental EA				-0.0118231	0.584418					-0.0314882	0.133186
Thought Problems	2263						2216
PGI Offspring EA		-0.0190624	0.349516	0.0416244	0.252769			-0.0461094	0.0436383	-0.0086481	0.821983
PGI Parental EA				-0.0463271	0.0485634					-0.0284051	0.194533
Attention Problems	2274						2251
PGI Offspring EA		-0.0781613	8.68949e-05	-0.0572806	0.0856352			-0.119644	2.08373e-06	-0.104809	0.0098881
PGI Parental EA				-0.015955	0.455839					-0.0112297	0.674409
Externalizing Problem Behavior	2290						2264
PGI Offspring EA		-0.0727954	0.000274042	-0.0545031	0.0783874			-0.0874086	0.000273353	-0.0673692	0.0699704
PGI Parental EA				-0.0139616	0.499276					-0.015185	0.506744
Rule-Breaking Behavior	2267						2255
PGI Offspring EA		-0.0794526	8.92497e-05	-0.0721073	0.0273256			-0.0985724	2.48597e-05	-0.0871066	0.0173383
PGI Parental EA				-0.00560457	0.792277					-0.00867927	0.706281
Aggressive Behavior	2275						2249
PGI Offspring EA		-0.0618417	0.00200444	-0.0386913	0.208309			-0.0723864	0.00287032	-0.0476702	0.196295
PGI Parental EA				-0.0176782	0.38399					-0.0187358	0.408203

## Sheet: t4.cbcl_EAdecomposed_sex
Table 4.	Comparison of the estimated effects of decomposed EA offspring and parental polygenic indices on Behavioral scales by sex in the parental report sample (CBCL). All regressions include a set of controls. P-values are based on family clustered standard errors.
	Girls						Boys
Behavioral scale		Model 1		Model 2				Model 1		Model 2
Predictor	N	Beta	P-value	Beta	P-value		N	Beta	P-value	Beta	P-value
Anxious	2263						2241
PGI Offspring EA NonCognitive		0.0140581	0.81724	0.0939385	0.36785			0.00404629	0.936437	0.0365077	0.663358
PGI Offspring EA Cognitive		-0.0898761	0.148954	-0.112131	0.232058			-0.063814	0.206717	-0.0783612	0.287986
PGI Parental EA NonCognitive				-0.0603493	0.361674					-0.024505	0.67899
PGI Parental EA Cognitive				0.0194226	0.721609					0.0116296	0.803102
Withdrawn	2276						2251
PGI Offspring EA NonCognitive		-0.0188259	0.599654	0.0675107	0.318556			-0.00206564	0.959444	0.0328718	0.61297
PGI Offspring EA Cognitive		0.0158551	0.675299	-0.00680429	0.912929			-0.0101661	0.790916	0.0542986	0.411293
PGI Parental EA NonCognitive				-0.0649949	0.116678					-0.0258489	0.528024
PGI Parental EA Cognitive				0.0199853	0.602422					-0.0502407	0.239144
Somatic Complaints	2252						2243
PGI Offspring EA NonCognitive		-0.0353035	0.473265	0.0862504	0.237732			-0.0923631	0.00553734	-0.0973758	0.0799369
PGI Offspring EA Cognitive		-0.145595	0.00219882	-0.107664	0.121948			-0.0748704	0.0221199	-0.0953432	0.0807987
PGI Parental EA NonCognitive				-0.0918886	0.0600358					0.00368968	0.915936
PGI Parental EA Cognitive				-0.0261215	0.559377					0.016044	0.624971
Internalizing Problem Behavior	2290						2264
PGI Offspring EA NonCognitive		-0.0309909	0.789233	0.241677	0.21041			-0.0915333	0.344857	-0.0256882	0.871464
PGI Offspring EA Cognitive		-0.221181	0.0610717	-0.255607	0.144188			-0.143258	0.140028	-0.108366	0.473013
PGI Parental EA NonCognitive				-0.205765	0.10063					-0.0492624	0.645846
PGI Parental EA Cognitive				0.0340774	0.749929					-0.0267839	0.773851
Social Problems	2268						2250
PGI Offspring EA NonCognitive		-0.00667165	0.872615	0.0327878	0.670343			0.0140295	0.735777	0.044486	0.516167
PGI Offspring EA Cognitive		-0.084104	0.0566971	-0.125143	0.0505566			-0.0056293	0.90385	0.0330968	0.636414
PGI Parental EA NonCognitive				-0.0297736	0.524301					-0.0227069	0.605017
PGI Parental EA Cognitive				0.033026	0.376441					-0.0301585	0.452133
Thought Problems	2263						2216
PGI Offspring EA NonCognitive		0.0216856	0.494995	0.149157	0.00966095			-0.0729654	0.0423291	-0.0706186	0.237109
PGI Offspring EA Cognitive		-0.0291654	0.401096	-0.0536508	0.367734			-0.0458994	0.219214	0.0171074	0.768668
PGI Parental EA NonCognitive				-0.0959321	0.00942008					-0.00134488	0.969966
PGI Parental EA Cognitive				0.0226234	0.530378					-0.0493951	0.162876
Attention Problems	2274						2251
PGI Offspring EA NonCognitive		-0.063265	0.270273	0.0483368	0.633882			-0.194764	0.0053707	-0.154591	0.196469
PGI Offspring EA Cognitive		-0.216211	0.000855896	-0.319285	0.00358403			-0.306815	2.71529e-05	-0.264079	0.0143122
PGI Parental EA NonCognitive				-0.0841592	0.183624					-0.0299369	0.699397
PGI Parental EA Cognitive				0.0830413	0.1934					-0.0331337	0.639491
Externalizing Problem Behavior	2290						2264
PGI Offspring EA NonCognitive		-0.113976	0.179541	0.0836227	0.584834			-0.223572	0.0351392	-0.168656	0.314477
PGI Offspring EA Cognitive		-0.353332	0.000348648	-0.424348	0.00458575			-0.247959	0.022953	-0.197795	0.221006
PGI Parental EA NonCognitive				-0.149116	0.129305					-0.0409969	0.686274
PGI Parental EA Cognitive				0.0604723	0.488378					-0.038859	0.701857
Rule-Breaking Behavior	2267						2255
PGI Offspring EA NonCognitive		-0.0510582	0.0908385	-0.00833683	0.876571			-0.117931	0.000784154	-0.0904223	0.107836
PGI Offspring EA Cognitive		-0.121864	0.000405647	-0.147988	0.00758405			-0.0730008	0.0400752	-0.0655916	0.223612
PGI Parental EA NonCognitive				-0.0321471	0.348839					-0.0206169	0.552985
PGI Parental EA Cognitive				0.0215086	0.509672					-0.00554335	0.870275
Aggressive Behavior	2275						2249
PGI Offspring EA NonCognitive		-0.0644997	0.304404	0.0972934	0.386997			-0.102954	0.201324	-0.0712498	0.569319
PGI Offspring EA Cognitive		-0.228881	0.00134064	-0.268151	0.0133683			-0.179755	0.0269482	-0.138324	0.249213
PGI Parental EA NonCognitive				-0.121883	0.0870645					-0.0235683	0.751608
PGI Parental EA Cognitive				0.0348669	0.581473					-0.0322444	0.671094

## Sheet: t5.ysr_EAfull_sex
Table 5.	Comparison of the estimated effects of full EA offspring and parental polygenic indices on Behavioral scales by sex in the self-reported sample (YSR). All regressions include a set of controls. P-values are based on family clustered standard errors.
	Sample of girls						Sample of boys
Behavioral scale		Model 1		Model 2				Model 1		Model 2
Predictor	N	Beta	P-value	Beta	P-value		N	Beta	P-value	Beta	P-value
Anxious	1642						1486
PGI Offspring EA		-0.0336043	0.243136	-0.070941	0.163702			0.0218727	0.225971	5.9227e-05	0.998416
PGI Parental EA				0.0282662	0.402592					0.0161386	0.355304
Withdrawn	1645						1487
PGI Offspring EA		-0.0191755	0.497746	-0.0495466	0.274544			0.0634192	0.0155293	0.0820902	0.0541336
PGI Parental EA				0.023	0.426322					-0.0138078	0.580538
Somatic Complaints	1643						1485
PGI Offspring EA		-0.141686	1.43226e-06	-0.16666	0.000453625			-0.0587622	0.00453887	-0.0602293	0.0817025
PGI Parental EA				0.018904	0.536009					0.00108457	0.956276
Internalizing Problem Behavior	1647						1491
PGI Offspring EA		-0.077454	0.00771246	-0.116006	0.0185513			0.0110681	0.578028	0.00555596	0.86631
PGI Parental EA				0.0291799	0.364352					0.00407694	0.834004
Social Problems	1644						1487
PGI Offspring EA		-0.00686798	0.799028	-0.0252298	0.591848			0.0346434	0.184369	0.0151778	0.733869
PGI Parental EA				0.0138987	0.632238					0.0143974	0.590624
Thought Problems	1640						1483
PGI Offspring EA		-0.014487	0.589713	-0.0488781	0.331865			0.0473939	0.0596069	-0.00430506	0.913236
PGI Parental EA				0.0260294	0.425043					0.0382268	0.0930614
Attention Problems	1643						1485
PGI Offspring EA		-0.0457787	0.0712288	-0.0525629	0.241554			-0.031406	0.261541	-0.0583287	0.209645
PGI Parental EA				0.0051335	0.854594					0.0198924	0.466107
Externalizing Problem Behavior	1647						1491
PGI Offspring EA		-0.0583568	0.0171174	-0.0640029	0.109264			-0.0120148	0.66824	-0.00942663	0.842679
PGI Parental EA				0.00427343	0.869512					-0.00191428	0.948651
Rule-Breaking Behavior	1638						1484
PGI Offspring EA		-0.0820033	0.000278759	-0.0847413	0.0268437			-0.0384001	0.158443	-0.0533939	0.240058
PGI Parental EA				0.0020736	0.932598					0.0110902	0.715657
Aggressive Behavior	1639						1484
PGI Offspring EA		-0.0337124	0.176158	-0.0379243	0.353812			-2.45316e-05	0.999273	0.015605	0.738974
PGI Parental EA				0.0031893	0.905571					-0.0115565	0.682289

## Sheet: t6.ysr_EAdecomposed_sex
Table 6.	Comparison of the estimated effects of decomposed EA offspring and parental polygenic indices on Behavioral scales by sex in the self-reported sample (YSR). All regressions include a set of controls. P-values are based on family clustered standard errors.
	Girls						Boys
Behavioral scale		Model 1		Model 2				Model 1		Model 2
Predictor	N	Beta	P-value	Beta	P-value		N	Beta	P-value	Beta	P-value
Anxious	1642						1486
PGI Offspring EA NonCognitive		0.111302	0.26518	0.064201	0.710921			0.0252609	0.691575	-0.055399	0.59982
PGI Offspring EA Cognitive		-0.109455	0.311263	-0.219145	0.187557			0.095696	0.153895	0.0303529	0.76545
PGI Parental EA NonCognitive				0.033713	0.765729					0.0605316	0.371303
PGI Parental EA Cognitive				0.0845865	0.417504					0.0502569	0.391672
Withdrawn	1645						1487
PGI Offspring EA NonCognitive		0.045435	0.463432	0.00577434	0.956112			0.116217	0.070377	0.0465403	0.639278
PGI Offspring EA Cognitive		0.00299543	0.964819	-0.108993	0.30275			0.148936	0.010131	0.175614	0.0704679
PGI Parental EA NonCognitive				0.0283535	0.652097					0.0525747	0.394683
PGI Parental EA Cognitive				0.0866159	0.193335					-0.0210385	0.717769
Somatic Complaints	1643						1485
PGI Offspring EA NonCognitive		-0.151086	0.0572017	-0.0905245	0.457669			-0.0719113	0.177402	-0.135366	0.11708
PGI Offspring EA Cognitive		-0.371914	2.77675e-06	-0.445537	0.000360262			-0.085992	0.103751	-0.0588325	0.47509
PGI Parental EA NonCognitive				-0.0443797	0.544094					0.0477718	0.334569
PGI Parental EA Cognitive				0.0591951	0.431776					-0.0213847	0.668648
Internalizing Problem Behavior	1647						1491
PGI Offspring EA NonCognitive		0.00211325	0.991331	-0.0276043	0.932391			0.0689839	0.614127	-0.1528	0.495473
PGI Offspring EA Cognitive		-0.461266	0.0313006	-0.749653	0.0228764			0.170009	0.217659	0.157409	0.474257
PGI Parental EA NonCognitive				0.0202547	0.921437					0.166721	0.241223
PGI Parental EA Cognitive				0.225014	0.269018					0.00866256	0.94765
Social Problems	1644						1487
PGI Offspring EA NonCognitive		0.0393261	0.510397	0.0419701	0.677351			0.0274244	0.657297	-0.098653	0.296197
PGI Offspring EA Cognitive		-0.036502	0.553658	-0.134147	0.176898			0.188946	0.000996654	0.202162	0.0363977
PGI Parental EA NonCognitive				-0.00240434	0.966805					0.0949434	0.115197
PGI Parental EA Cognitive				0.0764966	0.201545					-0.0109111	0.852364
Thought Problems	1640						1483
PGI Offspring EA NonCognitive		0.0289429	0.635621	0.0722656	0.529673			0.0163381	0.782152	-0.11398	0.216201
PGI Offspring EA Cognitive		-0.0329158	0.656686	-0.188492	0.129664			0.0956452	0.106695	0.0371009	0.687702
PGI Parental EA NonCognitive				-0.0323253	0.64312					0.0978225	0.0921792
PGI Parental EA Cognitive				0.122824	0.103851					0.0446358	0.426093
Attention Problems	1643						1485
PGI Offspring EA NonCognitive		-0.114372	0.147545	-0.0693324	0.623167			-0.166774	0.0709688	-0.311727	0.0274212
PGI Offspring EA Cognitive		-0.0736473	0.364193	-0.118267	0.383999			-0.0351495	0.662395	-0.0601318	0.659091
PGI Parental EA NonCognitive				-0.0329693	0.689572					0.108901	0.187919
PGI Parental EA Cognitive				0.0360853	0.672157					0.0186652	0.829999
Externalizing Problem Behavior	1647						1491
PGI Offspring EA NonCognitive		-0.203748	0.165743	0.0832657	0.744949			-0.179013	0.350023	-0.394982	0.183562
PGI Offspring EA Cognitive		-0.467048	0.00542906	-0.579724	0.0224884			0.15656	0.397939	0.467736	0.150308
PGI Parental EA NonCognitive				-0.209009	0.195312					0.163519	0.37336
PGI Parental EA Cognitive				0.0955627	0.545748					-0.242493	0.244483
Rule-Breaking Behavior	1638						1484
PGI Offspring EA NonCognitive		-0.132029	0.0239228	-0.05627	0.572121			-0.0861078	0.260779	-0.237031	0.0348903
PGI Offspring EA Cognitive		-0.20502	0.00179347	-0.250727	0.0144475			-0.0313805	0.64893	0.0848163	0.475458
PGI Parental EA NonCognitive				-0.0552522	0.384001					0.113951	0.141406
PGI Parental EA Cognitive				0.0378093	0.557946					-0.0909123	0.238825
Aggressive Behavior	1639						1484
PGI Offspring EA NonCognitive		-0.063578	0.559864	0.157057	0.420446			-0.0933281	0.495665	-0.135474	0.538603
PGI Offspring EA Cognitive		-0.278768	0.0213265	-0.340094	0.0695219			0.150805	0.264554	0.352093	0.140101
PGI Parental EA NonCognitive				-0.160524	0.183576					0.0320669	0.803625
PGI Parental EA Cognitive				0.0536473	0.652586					-0.155804	0.3028

## Sheet: t7.EAfull_sex_interaction
Table 7.	Comparison of the estimated sex-interaction effects of full EA offspring and parental polygenic indices on Behavioral scales across CBCL and YSR samples. All regressions include a set of controls, as well as sex-interactions with controls. P-values are based on family clustered standard errors.
	CBCL	Model 1		Model 2			YSR		Model 2
Behavioral scale		Model 1	p-value	Model 2	p-value			Model 1	p-value	Model 2	p-value
Sex interaction with	N	Beta	P-value	Beta	P-value		N	Beta	P-value	Beta	P-value
Anxious	4504						3128
PGI Offspring EA		-0.0130604	0.67151	0.0210796	0.680489			-0.055477	0.104285	-0.0710002	0.23541
PGI Parental EA				-0.0260316	0.408201					0.0121275	0.747469
Withdrawn	4527						3132
PGI Offspring EA		-0.0202104	0.478338	-0.0189928	0.693645			-0.0825947	0.0298449	-0.131637	0.0374327
PGI Parental EA				-0.00110641	0.970669					0.0368079	0.333161
Somatic Complaints	4495						3128
PGI Offspring EA		-0.031807	0.306213	0.0124238	0.801269			-0.0829236	0.019892	-0.106431	0.0731805
PGI Parental EA				-0.0339843	0.266882					0.0178195	0.622334
Internalizing Problem Behavior	4554						3138
PGI Offspring EA		-0.0244275	0.421758	0.00528536	0.915543			-0.0885221	0.0114276	-0.121562	0.0432785
PGI Parental EA				-0.022778	0.453488					0.025103	0.498453
Social Problems	4518						3131
PGI Offspring EA		-0.0497478	0.0983347	-0.0757587	0.122321			-0.0415114	0.266048	-0.0404076	0.537826
PGI Parental EA				0.0196651	0.511116					-0.000498711	0.98992
Thought Problems	4479						3123
PGI Offspring EA		0.027047	0.361575	0.0502725	0.348519			-0.0618809	0.0908276	-0.044573	0.488567
PGI Parental EA				-0.017922	0.564055					-0.0121974	0.756854
Attention Problems	4525						3128
PGI Offspring EA		0.0414832	0.187669	0.047528	0.372103			-0.0143727	0.701451	0.00576577	0.929334
PGI Parental EA				-0.00472533	0.889174					-0.0147589	0.707385
Externalizing Problem Behavior	4554						3138
PGI Offspring EA		0.0146132	0.628995	0.0128661	0.790528			-0.046342	0.211791	-0.0545762	0.376334
PGI Parental EA				0.00122339	0.967453					0.00618771	0.873519
Rule-Breaking Behavior	4522						3122
PGI Offspring EA		0.0191197	0.523193	0.0149993	0.760764			-0.0436032	0.217622	-0.0313475	0.601842
PGI Parental EA				0.0030747	0.92062					-0.00901665	0.817673
Aggressive Behavior	4524						3123
PGI Offspring EA		0.0105448	0.729153	0.00897895	0.852615			-0.0336878	0.354324	-0.0535294	0.384488
PGI Parental EA				0.00105765	0.971295					0.0147458	0.698499

## Sheet: t8.EAdecomposed_sex_interaction
Table 8.	Comparison of the estimated sex-interaction effects of decomposed EA offspring and parental polygenic indices on Behavioral scales across CBCL and YSR samples. All regressions include a set of controls, as well as sex-interactions with controls. P-values are based on family clustered standard errors.
	CBCL						YSR
Behavioral scale		Model 1		Model 2				Model 1		Model 2
Sex interaction with	N	Beta	P-value	Beta	P-value		N	Beta	P-value	Beta	P-value
Anxious	4504						3128
PGI Offspring EA NonCognitive		0.00411529	0.896714	0.0236067	0.662573			0.0261729	0.465013	0.0363811	0.55547
PGI Offspring EA Cognitive		-0.0107127	0.741682	-0.0138808	0.783534			-0.0624049	0.107134	-0.0758946	0.207612
PGI Parental EA NonCognitive				-0.0147337	0.677141					-0.00815796	0.836349
PGI Parental EA Cognitive				0.00320329	0.912548					0.0104427	0.775261
Withdrawn	4527						3132
PGI Offspring EA NonCognitive		-0.00941932	0.751103	0.0194672	0.707155			-0.0323193	0.424747	-0.0186138	0.776637
PGI Offspring EA Cognitive		0.014624	0.620834	-0.0343401	0.507422			-0.0666369	0.0933379	-0.129952	0.0515948
PGI Parental EA NonCognitive				-0.0220002	0.487354					-0.0110594	0.778903
PGI Parental EA Cognitive				0.0394672	0.215569					0.0491552	0.223151
Somatic Complaints	4495						3128
PGI Offspring EA NonCognitive		0.0320356	0.328254	0.103095	0.0445616			-0.0317489	0.405112	0.0179816	0.76568
PGI Offspring EA Cognitive		-0.0397077	0.211907	-0.00691764	0.890546			-0.114655	0.0026536	-0.155069	0.010601
PGI Parental EA NonCognitive				-0.0536615	0.0991515					-0.0369528	0.294906
PGI Parental EA Cognitive				-0.0236734	0.439713					0.0323125	0.366061
Internalizing Problem Behavior	4554						3138
PGI Offspring EA NonCognitive		0.0129329	0.679572	0.0571138	0.276561			-0.0103285	0.776485	0.019337	0.751265
PGI Offspring EA Cognitive		-0.0166458	0.600951	-0.0314533	0.532542			-0.0975032	0.0121167	-0.1401	0.0237872
PGI Parental EA NonCognitive				-0.0334318	0.319998					-0.0226223	0.549557
PGI Parental EA Cognitive				0.013001	0.661628					0.0334165	0.366922
Social Problems	4518						3131
PGI Offspring EA NonCognitive		-0.0110071	0.722023	-0.0062201	0.909588			0.00561246	0.88875	0.0663138	0.306625
PGI Offspring EA Cognitive		-0.0417261	0.214829	-0.0841385	0.0998639			-0.106314	0.00713459	-0.158594	0.0166247
PGI Parental EA NonCognitive				-0.00375748	0.911358					-0.0459063	0.240469
PGI Parental EA Cognitive				0.0335961	0.25059					0.0412189	0.2993
Thought Problems	4479						3123
PGI Offspring EA NonCognitive		0.0603004	0.0452184	0.140015	0.0082517			0.00547512	0.881382	0.0808995	0.202573
PGI Offspring EA Cognitive		0.0106609	0.738799	-0.0450787	0.401108			-0.055843	0.174246	-0.0979906	0.146505
PGI Parental EA NonCognitive				-0.0602597	0.0587964					-0.0565323	0.142875
PGI Parental EA Cognitive				0.0458816	0.149338					0.0339626	0.405879
Attention Problems	4525						3128
PGI Offspring EA NonCognitive		0.0461772	0.141549	0.07126	0.199747			0.0175808	0.666261	0.0813236	0.226164
PGI Offspring EA Cognitive		0.0318166	0.344064	-0.0193864	0.721371			-0.012916	0.733486	-0.0195044	0.765682
PGI Parental EA NonCognitive				-0.0190407	0.586343					-0.0475975	0.22258
PGI Parental EA Cognitive				0.040796	0.21319					0.00584448	0.885409
Externalizing Problem Behavior	4554						3138
PGI Offspring EA NonCognitive		0.0251046	0.412354	0.0577882	0.269683			-0.00402896	0.917279	0.0779017	0.220578
PGI Offspring EA Cognitive		-0.0241375	0.462744	-0.0518952	0.302861			-0.101579	0.0117964	-0.170621	0.0115726
PGI Parental EA NonCognitive				-0.0247663	0.434522					-0.060681	0.124414
PGI Parental EA Cognitive				0.0227533	0.444885					0.0550659	0.189936
Rule-Breaking Behavior	4522						3122
PGI Offspring EA NonCognitive		0.0440887	0.142221	0.0541182	0.293745			-0.0187541	0.632706	0.0738218	0.230117
PGI Offspring EA Cognitive		-0.0322152	0.313677	-0.0543229	0.287682			-0.0709132	0.0645776	-0.137034	0.0341231
PGI Parental EA NonCognitive				-0.00760176	0.80951					-0.0691013	0.0904862
PGI Parental EA Cognitive				0.0178351	0.559574					0.052569	0.195571
Aggressive Behavior	4524						3123
PGI Offspring EA NonCognitive		0.0119287	0.701535	0.0522827	0.319786			0.00649973	0.862711	0.0639113	0.316171
PGI Offspring EA Cognitive		-0.0152392	0.641559	-0.0402727	0.422156			-0.093852	0.0167157	-0.151227	0.023224
PGI Parental EA NonCognitive				-0.0304977	0.328654					-0.0420767	0.269685
PGI Parental EA Cognitive				0.0208182	0.484045					0.0457604	0.270051

## Sheet: t9.wald
Table 9.	Comparison of estimated coefficients across CBCL and YSR samples using Wald tests for Offspring PGIs. P-values based on the null hypothesis of equal effects across models. Standard errors are calculated assuming independence across samples.
Behavioral scale	Value	PGI Offspring EA	PGI Offspring EA NonCognitive	PGI Offspring EA Cognitive
Anxious	Difference (CBCL-YSR)	0.0232887	0.0209482	-0.0116674
	P-value	0.541121	0.61379	0.754977
Withdrawn	Difference (CBCL-YSR)	0.0184502	0.0128779	-0.00200924
	P-value	0.637275	0.761873	0.960662
Somatic Complaints	Difference (CBCL-YSR)	0.090476	0.0390807	0.0468642
	P-value	0.0179659	0.323315	0.221789
Internalizing Problem Behavior	Difference (CBCL-YSR)	0.0532245	0.0325743	0.0073557
	P-value	0.166023	0.425431	0.848827
Social Problems	Difference (CBCL-YSR)	0.010894	0.0303666	-0.0342993
	P-value	0.785909	0.477282	0.403113
Thought Problems	Difference (CBCL-YSR)	0.0423517	0.0316069	0.0208863
	P-value	0.302242	0.449228	0.622619
Attention Problems	Difference (CBCL-YSR)	-0.0261736	0.037443	-0.0687219
	P-value	0.524418	0.385242	0.0980472
Externalizing Problem Behavior	Difference (CBCL-YSR)	-0.0210132	0.0132488	-0.0579079
	P-value	0.593616	0.746774	0.172977
Rule-Breaking Behavior	Difference (CBCL-YSR)	-0.00651685	0.0267066	-0.0323783
	P-value	0.864249	0.503645	0.430772
Aggressive Behavior	Difference (CBCL-YSR)	-0.0294833	-0.000948911	-0.060126
	P-value	0.453811	0.981644	0.151015
